# Supplementary material
Source: publisher figshare collection journal article supplement (https://gsapubs.figshare.com/ndownloader/files/23306150)
Supplement: Supplementary file 1 [file 23306150]

## Sheet: Table DR1
Table DR1. LA-ICPMS zircon U–Pb dating data for the Xitieshan gabbro and granitoids
Analysis spot	Th	U	Common Pb	Th/U	U-Th-Pb isotopic ratio						Age (Ma)
	ppm	ppm	ppm		207Pb/206Pb	1σ	207Pb/235U	1σ	206Pb/238U	1σ	207Pb/206Pb	1σ	207Pb/235U	1σ	206Pb/238U	1σ	Discordance*
Gabbro
B1204-1-1	217	432	84.1508	0.5	0.0538	0.0024	0.4324	0.0186	0.0587	0.0008	362	74	365	13	368	5	-0.821918
B1204-1-2	134	270	0	0.5	0.0565	0.0034	0.4541	0.0265	0.059	0.0009	473	101	380	19	369	6	2.89474
B1204-1-3	226	590	200.63	0.38	0.0537	0.0023	0.4385	0.0196	0.0594	0.0007	360	79	369	14	372	4	-0.813008
B1204-1-4	291	632	65.9745	0.46	0.0537	0.0024	0.4383	0.0207	0.0594	0.0008	358	82	369	15	372	5	-0.813008
B1204-1-5	340	709	172.692	0.48	0.0565	0.0034	0.4412	0.0202	0.0588	0.0007	472	79	371	14	368	5	0.808625
B1204-1-6	207	432	56.814	0.48	0.0562	0.0032	0.4454	0.0244	0.0594	0.0007	460	100	374	17	372	5	0.534759
B1204-1-7	188	395	0	0.48	0.0561	0.0034	0.4425	0.0256	0.0594	0.0009	458	103	372	18	372	5	0
B1204-1-8	164	352	18.1082	0.46	0.0553	0.0026	0.4454	0.0226	0.0593	0.0009	424	87	374	16	371	5	0.802139
B1204-1-9	288	652	52.1683	0.44	0.0546	0.002	0.4448	0.0184	0.0593	0.0007	396	72	374	13	372	4	0.534759
B1204-1-10	156	321	0.83828	0.49	0.0547	0.0029	0.4357	0.0221	0.0592	0.0009	398	86	367	16	371	6	-1.08992
B1204-1-11	401	971	49.5421	0.41	0.0553	0.0027	0.4495	0.021	0.059	0.0007	424	110	377	15	369	4	2.12202
B1204-1-12	325	648	0	0.5	0.0559	0.0026	0.4547	0.0204	0.059	0.0008	449	77	381	14	370	5	2.88714
B1204-1-13	238	350	0	0.68	0.0554	0.003	0.4496	0.0225	0.0591	0.0008	429	88	377	16	370	5	1.85676
B1204-1-14	218	551	0	0.4	0.0556	0.0019	0.459	0.0161	0.0596	0.0007	437	58	384	11	373	4	2.86458
B1204-1-15	212	535	81.5413	0.4	0.0534	0.0022	0.4378	0.0185	0.0594	0.0007	348	75	369	13	372	4	-0.813008
B1204-1-16	205	447	6.71303	0.46	0.0599	0.0028	0.4891	0.0221	0.0596	0.0009	599	73	404	15	373	5	7.67327
B1204-1-17	191	405	0	0.47	0.0551	0.0028	0.4523	0.0217	0.06	0.0008	415	84	379	15	376	5	0.791557
B1204-1-18	257	605	69.6835	0.42	0.0559	0.0023	0.4557	0.0166	0.0598	0.0009	450	55	381	12	374	5	1.83727
B1204-1-19	169	306	73.4771	0.55	0.0579	0.0034	0.4699	0.0254	0.0596	0.0009	525	91	391	18	373	6	4.60358
X-1 granite
B1201-1-1	1368	3570	275.543	0.38	0.0556	0.0011	0.459	0.0095	0.0596	0.0005	437	32	384	7	373	3	2.86458
B1201-1-2	951	2418	137.648	0.39	0.0557	0.0011	0.4535	0.0095	0.0589	0.0007	441	27	380	7	369	4	2.89474
B1201-1-3	895	1274	140.019	0.7	0.0562	0.0017	0.4593	0.0146	0.059	0.0007	459	50	384	10	370	4	3.64583
B1201-1-4	799	2003	65.9499	0.4	0.0539	0.0014	0.4408	0.0115	0.0592	0.0007	366	39	371	8	371	4	0
B1201-1-5	894	2519	191.965	0.35	0.0544	0.0021	0.4425	0.0165	0.059	0.0007	386	90	372	12	370	4	0.537634
B1201-1-6	769	2087	149.905	0.37	0.0522	0.0014	0.4259	0.0125	0.0591	0.001	293	38	360	9	370	6	-2.77778
B1201-1-7	241	384	362.326	0.63	0.0548	0.0024	0.4368	0.018	0.0593	0.001	404	63	368	13	371	6	-0.815217
B1201-1-8	585	3617	9.35099	0.16	0.0564	0.0019	0.4655	0.0165	0.0596	0.0005	467	64	388	11	373	3	3.86598
B1201-1-9	1128	1700	716.909	0.66	0.0572	0.0063	0.5502	0.0595	0.0706	0.0015	500	205	445	39	440	9	1.1236
B1201-1-10	731	3440	614.54	0.21	0.0582	0.0017	0.5713	0.016	0.0711	0.0009	536	40	459	10	443	5	3.48584
B1201-1-11	660	1122	23.3591	0.59	0.0542	0.0017	0.4439	0.0135	0.0593	0.0007	380	47	373	9	371	4	0.536193
B1201-1-12	949	1641	139.908	0.58	0.0541	0.0014	0.4451	0.0116	0.0594	0.0006	373	39	374	8	372	4	0.534759
B1201-1-13	201	557	269.03	0.36	0.0558	0.0023	0.5376	0.0212	0.0703	0.0008	445	68	437	14	438	5	-0.228833
B1201-1-14	356	466	119.154	0.76	0.0593	0.0024	0.4845	0.0193	0.0592	0.0007	580	65	401	13	371	4	7.4813
B1201-1-15	625	1011	81.3511	0.62	0.057	0.0015	0.4702	0.0131	0.0595	0.0007	492	42	391	9	372	4	4.85934
B1201-1-16	479	678	47.1065	0.71	0.0578	0.0021	0.4741	0.0179	0.0594	0.0008	522	58	394	12	372	5	5.58376
B1201-1-17	85	3399	193.033	0.03	0.0569	0.0015	0.5554	0.013	0.0708	0.0009	488	60	449	9	441	5	1.78174
X-2 granite
B1205-1-1	2337	1891	175.272	1.24	0.0568	0.0023	0.5265	0.0192	0.0675	0.0009	482	58	429	13	421	5	1.8648
B1205-1-2	1242	1358	55.3017	0.91	0.0571	0.0015	0.5623	0.0167	0.0708	0.0009	495	44	453	11	441	5	2.64901
B1205-1-3	1334	1545	0	0.86	0.0534	0.0017	0.4344	0.0134	0.059	0.0007	347	50	366	9	370	4	-1.0929
B1205-1-4	711	914	45.3207	0.78	0.0539	0.0019	0.4406	0.0152	0.0592	0.0007	368	55	371	11	371	4	0
B1205-1-5	1016	1608	0	0.63	0.055	0.0013	0.4524	0.0118	0.0594	0.0007	413	36	379	8	372	5	1.84697
B1205-1-6	621	646	0	0.96	0.0552	0.0022	0.4515	0.0174	0.0598	0.0008	419	63	378	12	375	5	0.793651
B1205-1-7	212	843	31.0419	0.25	0.0552	0.0023	0.4911	0.0191	0.0649	0.0008	419	66	406	13	405	5	0.246305
B1205-1-8	1055	1435	222.588	0.74	0.054	0.0018	0.453	0.0171	0.0601	0.0006	371	67	379	12	376	4	0.791557
B1205-1-9	1171	1781	114.293	0.66	0.0554	0.0015	0.4521	0.0126	0.0593	0.0008	427	39	379	9	371	5	2.11082
B1205-1-10	855	1234	130.116	0.69	0.0558	0.0017	0.4554	0.0138	0.0593	0.0007	442	47	381	10	371	4	2.62467
B1205-1-11	1262	1543	164.643	0.82	0.0552	0.0014	0.4556	0.0117	0.0597	0.0005	420	41	381	8	374	3	1.83727
B1205-1-12	687	2976	95.1602	0.23	0.0546	0.0021	0.474	0.0179	0.0626	0.0008	398	62	394	12	391	5	0.761421
B1205-1-13	211	401	52.7045	0.52	0.0533	0.0026	0.4403	0.0222	0.0593	0.0008	339	91	370	16	372	5	-0.540541
B1205-1-14	509	624	42.6695	0.82	0.0544	0.0021	0.4422	0.017	0.059	0.0006	386	67	372	12	369	4	0.806452
B1205-1-15	3497	2609	72.7517	1.34	0.057	0.0021	0.5073	0.0159	0.0655	0.001	491	43	417	11	409	6	1.91847
X-3 granite
B1301-1-1	2927	3377	135.81	0.87	0.0544	0.0015	0.4452	0.012	0.0593	0.0006	387	42	374	8	372	4	0.534759
B1301-1-2	3409	4337	0	0.79	0.054	0.0011	0.4453	0.0093	0.0596	0.0005	370	31	374	7	373	3	0.26738
B1301-1-3	502	1110	0	0.45	0.0546	0.0013	0.4494	0.0096	0.0597	0.0005	396	55	403	10	404	3	-0.248139
B1301-1-4	3542	3456	192.889	1.02	0.0536	0.0015	0.4457	0.0128	0.0599	0.0006	394	32	377	7	374	3	0.795756
B1301-1-5	1215	1658	153.48	0.73	0.0525	0.0013	0.4338	0.0108	0.0596	0.0005	356	46	374	9	375	4	-0.26738
B1301-1-6	1294	2404	59.295	0.54	0.0543	0.0013	0.4455	0.011	0.0593	0.0006	307	41	366	8	373	3	-1.91257
B1301-1-7	1353	1816	140.436	0.75	0.0545	0.0018	0.4515	0.0152	0.0599	0.0008	382	37	374	8	371	4	0.802139
B1301-1-8	1282	1793	11.8022	0.71	0.0542	0.0013	0.4447	0.0107	0.0591	0.0006	392	51	378	11	375	5	0.793651
B1301-1-9	1011	1483	81.097	0.68	0.0553	0.0016	0.4555	0.0121	0.0591	0.0007	451	69	424	13	420	4	0.943396
B1301-1-10	1721	2431	527.889	0.71	0.0549	0.0013	0.4471	0.0107	0.059	0.0005	329	165	370	25	374	4	-1.08108
B1301-1-11	4004	3772	100.734	1.06	0.057	0.0015	0.4669	0.0118	0.0595	0.0006	380	36	374	8	370	4	1.06952
B1301-1-12	2337	2611	149.357	0.9	0.0572	0.0014	0.4693	0.0119	0.0594	0.0006	426	38	381	8	370	4	2.88714
B1301-1-13	3627	3665	296.347	0.99	0.053	0.0043	0.44	0.036	0.0597	0.0007	361	127	371	20	370	4	0.269542
B1301-1-14	3998	3940	59.7289	1.01	0.0538	0.0035	0.4416	0.0286	0.0591	0.0007	408	37	375	7	369	3	1.6
B1301-1-15	1082	1475	497.503	0.73	0.0514	0.0027	0.4214	0.0221	0.0593	0.0006	258	102	357	16	371	4	-3.92157
B1301-1-16	805	1424	27.4601	0.57	0.0533	0.0029	0.4378	0.0248	0.0594	0.0007	490	38	389	8	372	4	4.37018
B1301-1-17	833	1230	244.575	0.68	0.0559	0.0021	0.4506	0.0172	0.0585	0.0008	519	64	449	14	435	5	3.11804
B1301-1-18	1494	2067	57.8781	0.72	0.0556	0.0015	0.4525	0.0133	0.0594	0.001	498	40	391	8	372	3	4.85934
B1301-1-19	1404	2209	992.828	0.64	0.054	0.0019	0.439	0.0179	0.0595	0.0015	340	108	369	18	372	4	-0.813008
B1301-1-20	1978	2442	486.181	0.81	0.0546	0.0017	0.487	0.0152	0.0647	0.0006	450	60	378	12	367	5	2.91005
B1301-1-21	2052	2803	41.4674	0.73	0.056	0.0024	0.5181	0.02	0.0673	0.0006	436	36	379	9	372	6	1.84697
B1301-1-22	841	1289	260.863	0.65	0.0577	0.0028	0.5566	0.0215	0.0698	0.0008	371	50	370	13	373	9	-0.810811
*Discordance=100*(1-(206Pb/238U) age/(207Pb/235U) age); Common Pb was corrected according to the method proposed by Anderson (2002).
References：
Andersen, T., 2002, Correction of common lead in U–Pb analyses that do not report 204Pb: Chemical Geology, v. 192, p. 59 - 79, doi: 10.1016/S0009-2541(02)00195-X.

## Sheet: Table DR2
Table DR2. Major (wt. %) and trace elements (ppm) compositions of the Xitieshan gabbro and granitoids
	Gabbro						X-1 granite						X-2 granite				X-3 granite
Sample number	B1204-1	B1204-2	B1204-3	B1204-4	B1204-5	B1204-6	B1201-1	B1201-2	B1201-3	B1201-4	B1201-5	CL05-107*	B1205-1	B1205-2	B1205-3	B1205-4	B1301-1	B1302-1	B1302-2	B1303-1	B1303-2
SiO2	51	51	51.7	52.2	49.8	49.1	72.6	70.9	71.5	71.9	71.8	72.28	73	72.8	73.1	72.8	69.2	68.9	68.5	68.9	68.8
Al2O3	16.8	16.5	15.95	16.05	17	16.95	14.1	14.4	14.35	14	14.05	14.27	13.6	13.65	13.7	13.85	15	14.9	14.75	15.05	14.9
K2O	0.33	0.31	0.8	0.37	0.2	0.18	4.24	4.11	4.08	4.39	4.28	4.17	4.46	4.4	4.31	4.12	4.16	4.23	4.06	4.16	4.33
Na2O	3.82	3.81	3.74	4.01	3.27	3.26	3.35	3.48	3.43	3.27	3.48	3.24	3.65	3.64	3.49	3.68	3.65	3.52	3.65	3.58	3.53
FeOT	8.24	7.97	8.53	8.13	7.83	8.26	1.85	2	1.93	1.79	1.91	2.02	1.6	1.63	1.48	1.53	2.97	3.07	3.22	3.05	2.83
CaO	9.22	9.35	8.72	8.39	9.2	9.2	1.76	1.94	1.88	1.69	1.66	1.88	1.28	1.36	1.4	1.56	2.4	2.39	2.35	2.59	2.32
MgO	6.3	6.4	6.41	7.02	8.19	8.18	0.68	0.76	0.72	0.67	0.75	0.81	0.58	0.61	0.59	0.54	0.96	0.94	1	1.04	0.93
TiO2	1.54	1.54	1.44	1.3	1.11	1.13	0.29	0.31	0.3	0.27	0.28	0.31	0.22	0.22	0.21	0.22	0.43	0.45	0.46	0.44	0.43
P2O5	0.18	0.19	0.13	0.14	0.11	0.12	0.07	0.08	0.08	0.07	0.07	0.09	0.05	0.05	0.05	0.05	0.11	0.11	0.12	0.12	0.11
MnO	0.12	0.11	0.15	0.13	0.13	0.12	0.04	0.05	0.04	0.04	0.04	0.04	0.03	0.03	0.04	0.04	0.05	0.06	0.06	0.06	0.05
LOI	1.39	1.47	1.62	1.52	1.97	2.03	0.79	1.04	0.84	0.75	1.23	0.68	0.87	0.88	0.85	0.7	0.55	0.63	0.71	0.56	0.62
Mg#	57.7	58.9	57.3	60.6	65.1	63.8	39.5	40.4	40	40	41.2	41.7	39.2	40	41.5	38.6	36.6	35.3	35.6	37.8	36.9
Li	5.3	4.3	7.1	7.7	9.2	9.3	36.4	43.2	32.9	34.8	21.7	22.3	8.2	8.6	14.2	15.2	26.5	35.1	30.2	43.5	41.7
Be	1.4	1.5	1.11	1.18	0.77	0.83	2.51	2.12	2.19	1.85	2.95	2.4	2.07	2.31	2.22	2.18	2.82	2.99	3.12	3.36	2.98
Sc	34.5	34.5	33.4	33	31	30.5	5.1	5.4	5	4.9	5	5.2	4.1	4.2	4.1	4.1	7.2	8.2	8.5	8.8	7.7
V	199.8	212.2	197.8	192.7	179.9	175.9	23.6	28.4	26.5	24.1	24.3		14.7	15	15.2	15.6	33.4	33.1	34.5	36.5	32.8
Cr	87.1	90.1	123.4	118.4	178.2	182.9	7.3	7.2	7.1	6.3	8.9	9.6	9	9.7	10.1	5.9	17.9	16.1	19.7	19.2	15.9
Co	50.9	53	55.2	42.2	47.7	51.5	145.7	130	46.5	107.4	77.4	3.8	63.6	103.1	170.5	135.5	104.2	128.5	86.8	25.7	70.4
Ni	36	42	40.6	54.3	95.6	93.7	5.8	6.1	4.5	5.1	9	4.7	10.8	11.3	11.2	6.2	13.9	12.3	14.4	13.5	11.2
Cu	11.9	21.6	36.2	37.2	47.7	34.4	5.8	5.6	5.6	6.9	6.9	8.3	5.1	5.3	5.5	5.1	6.2	8.9	7.2	30.8	9.8
Zn	51.1	52.3	58	55.8	50.4	50.3	37.7	40.8	39.3	37.5	36.2	44.2	31.7	32.7	37.2	35.9	53.4	53.7	57.2	57.7	51.9
Ga	18	18.6	17.8	17.3	15.2	15.6	16.7	17.2	16.8	15.9	16.3	16.6	15.7	16.2	16	15.9	18.6	18.8	19.6	19.2	18.9
Rb	7.3	7.5	31.6	12.1	5.6	4.5	186.7	177.7	155.6	169.1	178.8	161	174.7	173.6	192.2	177.6	170.4	190.1	199.2	195.6	201.2
Sr	365.8	407.2	325.1	321.9	347.8	312.6	140.9	165.6	172.5	153.9	164.7	145	125	130.9	135.9	138.9	155.7	157.2	185.2	160.2	161.1
Y	38.3	37.9	28.2	32.1	25.3	25.4	21.8	24.4	21.6	20.3	21.6	20.2	28	28.4	25.1	24.5	28.5	33.3	34.1	35.9	30.8
Zr	108.5	131.5	126.5	125.5	97	91.5	142	150.8	149.9	147.7	142	141	154.8	160.9	148.7	149.5	240	258.4	256.7	236.7	249
Nb	6.3	6.4	4.6	4.4	2.4	2.3	10.4	10.2	9.5	8.7	10.1	8.5	10.3	10.3	9.5	9.4	10.6	11.9	12.2	11.8	11.1
Sn	1.9	2.1	2	1.7	1.3	1.3	4.1	4.2	3.5	3.3	4.1		4	4	4.1	4	3.9	4.5	5.8	5.9	5.4
Cs	2.5	2.7	2.1	2.5	0.9	0.8	6.9	6.9	6	5.6	5.4	9.9	3.5	3.6	7.6	8.3	7.5	11.5	9.2	10.3	11.2
Ba	77	71.2	133.9	68.5	60.4	72.7	552.3	660.3	664.6	601.9	574.4	586	612.5	602.1	630.4	582.5	572.3	634.3	623	596.7	618.8
La	15.3	14.7	8.2	10.1	5.6	5.3	30.7	32.7	32	29.9	28.3	25.6	29.5	30.6	25.5	27.5	36.8	38.7	36	33.6	38.6
Ce	35.9	34.2	19	23.4	13.9	13.6	59.2	62	61.1	58.3	55.6	51.2	54.5	56.8	54.5	56.9	75.3	77.2	73.1	68.8	76.9
Pr	4.6	4.3	2.6	3.2	2	2	6.3	6.8	6.6	6.3	6	5.6	6	6	5.5	5.8	8.3	8.6	8.2	7.9	8.6
Nd	20.5	19.8	12.6	14.8	10.2	10.1	23.5	25.1	24.3	23.2	22.2	20.3	23	22.7	20.6	21.5	30.7	33	31.6	30.5	32.4
Sm	5.7	5.5	3.7	4.3	3.2	3.2	5	5.6	5	4.8	4.6	4.2	5.2	5	4.5	4.8	6.6	7.2	6.9	7	6.9
Eu	1.51	1.58	1.46	1.33	1.06	1.08	0.79	0.84	0.83	0.81	0.79	0.76	0.73	0.77	0.72	0.71	1.13	1.16	1.2	1.16	1.23
Gd	6.3	6.1	4.5	4.9	3.8	3.8	3.9	4.8	4.1	4.2	3.9	3.8	4.6	4.6	4.1	4.2	5.6	6.2	6.3	6.4	5.9
Tb	1.07	1.06	0.78	0.86	0.71	0.71	0.67	0.76	0.66	0.65	0.65	0.6	0.8	0.83	0.74	0.72	0.86	1	1.02	1.04	0.93
Dy	6.82	6.71	4.9	5.59	4.54	4.61	3.91	4.64	3.93	3.76	3.94	3.46	4.86	4.87	4.46	4.13	5.07	5.88	5.95	6.41	5.42
Ho	1.37	1.33	1	1.11	0.94	0.9	0.76	0.87	0.73	0.71	0.75	0.68	0.94	0.95	0.82	0.82	0.97	1.13	1.17	1.22	1.07
Er	3.9	3.77	2.87	3.12	2.71	2.67	2.2	2.55	2.12	2.05	2.2	2.14	2.73	2.7	2.33	2.25	2.79	3.22	3.36	3.5	2.98
Tm	0.55	0.54	0.43	0.47	0.39	0.37	0.33	0.36	0.32	0.3	0.33	0.29	0.41	0.41	0.35	0.34	0.39	0.48	0.48	0.52	0.47
Yb	3.6	3.41	2.71	2.97	2.44	2.44	2.12	2.18	1.95	1.91	2.24	1.9	2.65	2.66	2.37	2.28	2.61	3.04	3.08	3.32	3
Lu	0.54	0.53	0.42	0.44	0.37	0.37	0.31	0.32	0.3	0.29	0.33	0.3	0.41	0.4	0.35	0.34	0.41	0.46	0.45	0.52	0.43
Hf	3.16	3.67	3.18	3.3	2.46	2.28	4.12	4.33	4.25	4.34	4.43	3.9	4.76	4.68	4.38	4.42	6.33	7.22	6.83	6.58	6.73
Ta	0.63	0.61	0.46	0.43	0.25	0.23	1.7	1.32	1.39	1.14	2	0.91	1.42	1.58	1.6	1.53	1.16	1.79	1.31	1.5	1.34
Tl	0.06	0.05	0.16	0.06	0.05	0.03	0.99	0.98	0.87	0.94	0.95		0.88	0.86	1.02	1	0.97	1.05	1.16	1.11	1.15
Pb	5.33	4.96	3.65	8.8	2.81	4.22	29.79	27.57	26.3	28.41	25.88	23	22.08	22.53	26.1	26.05	26.54	30.32	29.12	29.53	30.18
Th	2.44	2.48	3.21	2.95	1.71	1.87	15.25	17.88	16.15	16.42	17.03	16	17.05	17.2	17.39	18.3	17.7	20.81	19.27	16.7	20.16
U	0.81	0.84	0.92	0.82	0.51	0.52	3.16	2.65	2.87	2.8	3.39	2.38	2.61	2.52	2.05	2.16	1.96	2.95	2.86	2.49	2.72
δEu	0.77	0.83	1.09	0.89	0.93	0.93	0.54	0.5	0.56	0.56	0.57	0.59	0.46	0.49	0.51	0.49	0.56	0.52	0.55	0.52	0.57
(La/Yb)N	3	3.1	2.2	2.4	1.6	1.6	10.4	10.8	11.8	11.2	9.1	9.7	8	8.2	7.7	8.7	10.1	9.1	8.4	7.3	9.2
FeOT denotes totally FeO; LOI=loss of ignition; Mg# =100×Mg/(Mg+Fe) in atomic ratio; (La/Yb)N= (Lasample/Lachondrite)/ (Ybsample/Ybchondrite), δEu= (Eusample/Euchondrite)/(Smsample/Smchondrite+Gdsample/Gdchondrite) 1/2 and Chondrite normalizing values are from Sun and McDonough (1989). * Data are from Wu et al. (2007).
References：
Sun, S.S., McDonough, W.F., 1989. Chemical and isotopic systematics of oceanic basalts: implications for mantle composition and processes. Geological Society, London, Special Publications 42: 313-345.
Wu, C.L., Gao, Y.H., Wu, S.P., Chen, Q.L., Wooden, J.L., Mazadab, F.K., Mattinson, C., 2007. Zircon SHRIMP U-Pb dating of granites from the Da Qaidam area in the north margin of Qaidam basin, NW China. Acta Petrologica Sinica 23: 1861-1875.

## Sheet: Table DR3
Table DR3. Sr and Nd isotopic compositions of the Xitieshan gabbro and granitoids
Rock type	Gabbro					X-1 granite				X-2 granite			X-3 granite
Sample No.	B1204-1	B1204-2	B1204-4	B1204-5	B1204-6	B1201-2	B1201-3	B1201-4	B1201-5	B1205-1	B1205-2	B1205-3	B1301-1	B1302-1	B1302-2	B1303-1
Rb (ppm)	7.7	7.6	12.1	6.3	4.6	173	154.6	171.9	182.1	173.8	181.9	185.9	183.1	189.4	196.1	194.9
Sr (ppm)	370.3	404.5	311.5	342.3	310.2	165.7	172.5	154.4	168.2	124.8	129.9	133	162	159.4	182.4	162.7
87Rb/86Sr	0.06	0.054	0.112	0.053	0.042	3.015	2.589	3.216	3.127	4.023	4.047	4.038	3.266	3.432	3.106	3.461
87Sr/86Sr	0.70785	0.70822	0.70787	0.70774	0.70724	0.72496	0.72294	0.72597	0.7262	0.72961	0.7287	0.72954	0.72789	0.72895	0.72785	0.72905
l σ	3e-05	6e-05	7e-05	5e-05	2e-05	2e-05	8e-05	5e-05	5e-05	9e-05	8e-05	6e-05	4e-05	2e-05	8e-05	5e-05
(87Sr/86Sr)i	0.70753	0.70793	0.70728	0.70746	0.70702	0.70899	0.70923	0.70894	0.70964	0.7083	0.70727	0.70815	0.71059	0.71077	0.7114	0.71072
Sm (ppm)	5.5	5.2	4	3.1	3.3	5.4	4.7	4.3	4.7	4.8	4.8	4.3	6.5	6.7	6.7	6.8
Nd (ppm)	21.4	20.1	14.9	10.5	11.8	27.2	24.6	22.6	24	22.9	23.4	20.4	33.4	33.4	32.9	33.5
147Sm/144Nd	0.1543	0.1571	0.1634	0.1768	0.1703	0.1203	0.1158	0.1163	0.1184	0.1262	0.1253	0.1279	0.117	0.1216	0.1231	0.1236
143Nd/144Nd	0.512625	0.512651	0.512735	0.51288	0.512901	0.512217	0.512202	0.512215	0.512208	0.512256	0.512257	0.512243	0.512231	0.512237	0.512257	0.51224
l σ	5e-06	4e-06	3e-06	5e-06	7e-06	6e-06	5e-06	3e-06	6e-06	6e-06	5e-06	5e-06	4e-06	3e-06	6e-06	5e-06
εNd(t)	1.76	2.13	3.48	5.66	6.39	-4.59	-4.66	-4.43	-4.66	-4.1	-4.04	-4.43	-4.16	-4.25	-3.94	-4.29
TDM2(Nd)(Ma)	979	948	839	661	602	1495	1502	1483	1502	1456	1451	1484	1460	1469	1443	1472
(87Sr/86Sr)i, (143Nd/144Nd)i and εNd(t) values are calculated at t=372 Ma based on present-day (147Sm/144Nd)CHUR=0.1967 (Jacobsen and Wasserburg, 1980) and (143Nd/144Nd)CHUR = 0.512638 (Goldstein et al., 1984). TDM2 values are calculated based on present-day (147Sm/144Nd)DM=0.2137, (143Nd/144Nd)DM=0.51315 and (147Sm/144Nd)C = 0.118 (Peucat et al., 1989). λRb=1.42×10−11 year−1 (Steiger and Jäger, …
References：
Jacobsen, S.B., Wasserburg, G.J., 1980. Sm-Nd isotopic evolution of chondrites. Earth and Planetary Science Letters 50: 139-155.
Goldstein, S.L., O'Nions, R.K., Hamilton, P.J., 1984. A Sm-Nd isotopic study of atmospheric dusts and particulates from major river systems. Earth and Planetary Science Letters 70: 221-236.
Peucat, J.J., Vidal, P., Bernard-Griffiths, J., Condie, K.C., 1989. Sr, Nd, and Pb Isotopic Systematics in the Archean Low- to High-Grade Transition Zone of Southern India: Syn-Accretion vs. Post-Accretion Granulites. The Journal of Geology 97: 537-549.
Steiger, R.H., Jäger, E., 1977. Subcommission on geochronology: Convention on the use of decay constants in geo- and cosmochronology. Earth and Planetary Science Letters 36: 359-362.
Lugmair, G.W., Marti, K., 1978. Lunar initial 143Nd/144Nd: Differential evolution of the lunar crust and mantle. Earth and Planetary Science Letters 39: 349-357.

## Sheet: Table DR4
Table DR4. Hf isotope compositions data for zircons from the Xitieshan gabbro and granitoids
Analysis spot	176Hf/177Hf	1σ	176Lu/177Hf	1σ	176Yb/177Hf	1σ	εHf(0)	1σ	εHf(t)	1σ	TDM (Hf)	TDM2 (Hf)	fLu/Hf
											(Ma)	(Ma)
Gabbro
B1204-1-1	0.282802	1e-05	0.00102	5e-06	0.022759	9.8e-05	1.1	0.6	8.9	0.7	638	745	-0.97
B1204-1-2	0.282812	2e-05	0.000447	1e-05	0.009994	0.000269	1.4	0.9	9.4	0.9	614	716	-0.99
B1204-1-3	0.282775	1.3e-05	0.00107	8e-06	0.023165	0.000235	0.1	0.7	8	0.7	677	796	-0.97
B1204-1-4	0.2828	1.3e-05	0.000622	3e-06	0.013549	6e-05	1	0.7	9	0.7	634	742	-0.98
B1204-1-5	0.282807	1.1e-05	0.00104	1.2e-05	0.022356	0.000258	1.2	0.6	9.1	0.7	632	735	-0.97
B1204-1-6	0.28277	1.2e-05	0.000663	1.9e-05	0.01458	0.000439	-0.1	0.7	8	0.7	677	801	-0.98
B1204-1-7	0.282756	1e-05	0.000683	1.6e-05	0.014611	0.000331	-0.6	0.6	7.4	0.6	698	830	-0.98
B1204-1-8	0.282803	1.2e-05	0.000727	1.2e-05	0.015833	0.00025	1.1	0.7	9.1	0.7	632	737	-0.98
B1204-1-9	0.282782	1e-05	0.001019	5e-06	0.022642	0.000138	0.3	0.6	8.3	0.6	667	783	-0.97
B1204-1-10	0.282763	1.2e-05	0.00066	9e-06	0.014146	0.000203	-0.3	0.7	7.7	0.7	686	815	-0.98
B1204-1-11	0.282795	1e-05	0.001063	2.3e-05	0.022035	0.000422	0.8	0.6	8.7	0.6	648	758	-0.97
B1204-1-13	0.282769	1.3e-05	0.000583	7e-06	0.013286	0.000163	-0.1	0.7	7.9	0.7	677	803	-0.98
B1204-1-14	0.282787	1.1e-05	0.001011	3e-06	0.02138	7.3e-05	0.5	0.6	8.5	0.7	659	771	-0.97
B1204-1-15	0.28279	1.3e-05	0.000811	1.1e-05	0.017159	0.000227	0.6	0.7	8.6	0.7	652	764	-0.98
B1204-1-16	0.282791	1.4e-05	0.000915	5e-06	0.019074	0.000106	0.7	0.7	8.7	0.7	652	763	-0.97
B1204-1-17	0.282806	1.2e-05	0.000523	7e-06	0.011586	0.000158	1.2	0.7	9.3	0.7	625	727	-0.98
B1204-1-18	0.282774	1e-05	0.000731	2.1e-05	0.015815	0.000459	0.1	0.6	8.1	0.7	672	792	-0.98
B1204-1-19	0.282793	1.2e-05	0.000893	3.9e-05	0.019234	0.000836	0.7	0.7	8.7	0.7	649	759	-0.97
X-1 granite
B1201-1-1	0.282647	3e-05	0.002066	3.1e-05	0.060896	0.001244	-4.4	1.2	3.2	1.2	881	1063	-0.94
B1201-1-3	0.282708	1.3e-05	0.001502	1.9e-05	0.037151	0.000703	-2.3	0.7	5.5	0.7	782	937	-0.95
B1201-1-4	0.282625	1e-05	0.001253	2.6e-05	0.029201	0.000663	-5.2	0.6	2.7	0.7	894	1095	-0.96
B1201-1-5	0.28267	1e-05	0.0012	3e-05	0.027582	0.000702	-3.6	0.6	4.3	0.7	828	1005	-0.96
B1201-1-6	0.282579	1.6e-05	0.001055	5e-05	0.026116	0.001256	-6.8	0.8	1.1	0.8	954	1183	-0.97
B1201-1-7	0.282696	2.6e-05	0.000897	5e-06	0.024823	6.8e-05	-2.7	1.1	5.3	1.1	786	951	-0.97
B1201-1-8	0.282565	2e-05	0.000568	2.1e-05	0.016093	0.000693	-7.3	0.9	0.7	0.9	961	1203	-0.98
B1201-1-9	0.282291	2e-05	0.000317	1.9e-05	0.008954	0.000568	-17	0.9	-7.4	0.9	1332	1707	-0.99
B1201-1-10	0.282355	1.1e-05	0.000983	4.8e-05	0.022908	0.001136	-14.7	0.6	-5.3	0.7	1266	1592	-0.97
B1201-1-11	0.282713	1.2e-05	0.002167	1.6e-05	0.054315	0.000399	-2.1	0.7	5.6	0.7	788	934	-0.93
B1201-1-12	0.282712	2.8e-05	0.001762	5e-06	0.051489	0.000264	-2.1	1.1	5.6	1.1	780	930	-0.95
B1201-1-13	0.2822	1.1e-05	9.1e-05	2e-06	0.002298	4.4e-05	-20.2	0.7	-10.6	0.7	1448	1881	-1
B1201-1-14	0.282755	1e-05	0.001032	7e-05	0.026695	0.002312	-0.6	0.6	7.3	0.7	704	835	-0.97
B1201-1-15	0.282735	1.1e-05	0.001529	8e-06	0.035564	0.000184	-1.3	0.7	6.5	0.7	743	882	-0.95
B1201-1-16	0.282651	1.3e-05	0.001029	1.8e-05	0.024278	0.000399	-4.3	0.7	3.7	0.7	851	1040	-0.97
B1201-1-17	0.282271	1e-05	0.000311	1.2e-05	0.007898	0.000292	-17.7	0.6	-8.1	0.7	1359	1745	-0.99
X-2 granite
B1205-1-1	0.282622	1.2e-05	0.001938	3e-05	0.048742	0.000789	-5.3	0.7	3.4	0.7	914	1092	-0.94
B1205-1-2	0.28265	2.6e-05	0.002404	6.9e-05	0.076093	0.001927	-4.3	1.1	4.7	1.1	885	1037	-0.93
B1205-1-3	0.28273	1.4e-05	0.00225	7.5e-05	0.056968	0.001987	-1.5	0.7	6.1	0.7	766	904	-0.93
B1205-1-4	0.282769	1e-05	0.001417	1.7e-05	0.03343	0.000451	-0.1	0.6	7.7	0.7	692	814	-0.96
B1205-1-5	0.282609	2.1e-05	0.00143	2.3e-05	0.041451	0.000809	-5.8	0.9	2.1	0.9	920	1128	-0.96
B1205-1-6	0.282733	1.3e-05	0.001336	1.8e-05	0.033061	0.00056	-1.4	0.7	6.5	0.7	742	882	-0.96
B1205-1-7	0.282265	9e-06	0.000452	2.6e-05	0.011115	0.000533	-17.9	0.6	-9.1	0.6	1372	1774	-0.99
B1205-1-8	0.282646	1.1e-05	0.001382	3.6e-05	0.036051	0.001067	-4.4	0.7	3.5	0.7	866	1053	-0.96
B1205-1-9	0.282668	2.7e-05	0.001487	7e-05	0.046554	0.002669	-3.7	1.1	4.1	1.1	838	1014	-0.96
B1205-1-10	0.282629	1.3e-05	0.002119	1.8e-05	0.04838	0.000334	-5	0.7	2.6	0.7	909	1099	-0.94
B1205-1-12	0.282579	1e-05	0.000982	1.2e-05	0.0248	0.000314	-6.8	0.6	1.9	0.6	953	1168	-0.97
B1205-1-13	0.282674	1.3e-05	0.001279	1.6e-05	0.028521	0.000383	-3.4	0.7	4.4	0.7	824	998	-0.96
B1205-1-14	0.282789	1.4e-05	0.001221	2e-05	0.028908	0.000426	0.6	0.7	8.4	0.7	661	773	-0.96
B1205-1-15	0.282611	2.7e-05	0.002063	5.9e-05	0.066079	0.002408	-5.7	1.1	2.7	1.1	934	1120	-0.94
X-3 granite
B1301-1-1	0.282621	2.9e-05	0.002854	8.2e-05	0.093505	0.002257	-5.3	1.1	2.1	1.2	940	1125	-0.91
B1301-1-2	0.282586	1.1e-05	0.001287	4.7e-05	0.032138	0.001211	-6.6	0.6	1.3	0.7	949	1171	-0.96
B1301-1-3	0.282596	1e-05	0.000774	1e-05	0.018818	0.000236	-6.2	0.6	2.5	0.6	923	1132	-0.98
B1301-1-4	0.282576	2.2e-05	0.001043	1.6e-05	0.032403	0.000704	-6.9	0.9	1	1	958	1188	-0.97
B1301-1-5	0.282641	1.2e-05	0.002171	3.3e-05	0.055653	0.000834	-4.6	0.7	3.1	0.7	892	1074	-0.93
B1301-1-6	0.2826	1.2e-05	0.0011	2.2e-05	0.0269	0.000529	-6.1	0.7	1.8	0.7	926	1142	-0.97
B1301-1-7	0.282596	1.4e-05	0.002156	4.4e-05	0.055014	0.00117	-6.2	0.7	1.4	0.7	958	1165	-0.94
B1301-1-9	0.282606	1.2e-05	0.00177	5.9e-05	0.04527	0.00162	-5.9	0.7	2.9	0.7	934	1122	-0.95
B1301-1-10	0.282567	2.4e-05	0.001398	2.2e-05	0.042781	0.00089	-7.3	1	0.6	1	980	1211	-0.96
B1301-1-11	0.282643	3.4e-05	0.0033	8.8e-05	0.110726	0.003856	-4.6	1.3	2.8	1.4	919	1088	-0.9
B1301-1-12	0.282628	2.7e-05	0.002053	1.9e-05	0.06437	0.000794	-5.1	1.1	2.6	1.1	908	1100	-0.94
B1301-1-13	0.282704	1.3e-05	0.003244	6.5e-05	0.085176	0.001767	-2.4	0.7	5	0.7	825	966	-0.9
B1301-1-14	0.282726	1.3e-05	0.002215	5.2e-05	0.057377	0.001477	-1.6	0.7	6	0.7	770	911	-0.93
B1301-1-15	0.282584	2.6e-05	0.00112	3.8e-05	0.034563	0.00101	-6.6	1	1.3	1.1	948	1173	-0.97
B1301-1-16	0.282639	1.2e-05	0.001117	3.3e-05	0.027814	0.000841	-4.7	0.7	3.2	0.7	871	1066	-0.97
B1301-1-17	0.282567	1e-05	0.000941	2.6e-05	0.022383	0.000634	-7.3	0.6	2.1	0.7	968	1180	-0.97
B1301-1-18	0.282599	1.2e-05	0.002696	0.000104	0.070259	0.00286	-6.1	0.7	1.4	0.7	968	1166	-0.92
B1301-1-19	0.282582	2.9e-05	0.001539	2.5e-05	0.04702	0.000642	-6.7	1.1	1.1	1.2	962	1184	-0.95
B1301-1-20	0.282595	4.1e-05	0.002479	5.3e-05	0.076686	0.001401	-6.2	1.5	1.2	1.5	967	1171	-0.93
B1301-1-21	0.282583	2.6e-05	0.001711	2.4e-05	0.054643	0.00083	-6.7	1.1	1.1	1.1	965	1184	-0.95
B1301-1-22	0.28259	2.3e-05	0.000957	2.8e-05	0.030702	0.001242	-6.4	1	1.5	1	936	1160	-0.97
εHf(0) and εHf(t) values were calculated using present-day (176Hf/177Hf)CHUR =0.282785 and (176Lu/177Hf)CHUR =0.0336 (Bouvier et al., 2008); TDM (Hf) values were calculated using present-day (176Hf/177Hf)DM=0.28325 and (176Lu/177Hf)DM=0.0384 (Griffin et al., 2000); TDM2(Hf) values were calculated using present-day (176Hf/177Hf)DM=0.283250, (176Lu/177Hf)DM=0.0384 (Griffin et al., 2000) and (176Lu/…
References：
Bouvier, A., Vervoort, J.D., Patchett, P.J., 2008. The Lu–Hf and Sm–Nd isotopic composition of CHUR: Constraints from unequilibrated chondrites and implications for the bulk composition of terrestrial planets. Earth and Planetary Science Letters 273: 48-57.
Griffin, W.L., Pearson, N.J., Belousova, E., Jackson, S.E., van Achterbergh, E., O Reilly, S.Y., Shee, S.R., 2000. The Hf isotope composition of cratonic mantle: LAM-MC-ICPMS analysis of zircon megacrysts in kimberlites. Geochimica et Cosmochimica Acta 64: 133-147.
Griffin, W.L., Wang, X., Jackson, S.E., Pearson, N.J., O'Reilly, S.Y., Xu, X., Zhou, X., 2002. Zircon chemistry and magma mixing, SE China: In-situ analysis of Hf isotopes, Tonglu and Pingtan igneous complexes. Lithos 61: 237-269.
